# Supplementary material for: Assessing the impact of novelty and conformity on hesitancy towards COVID-19 vaccines using mRNA technology
Source: PubMed Central journal article supplement (PMC9156695; doi:10.1038/s43856-022-00123-6), 2022-05-31
Supplement: 43856_2022_123_MOESM1_ESM.pdf [file 43856_2022_123_MOESM1_ESM.pdf]

## **Description of Additional Supplementary Files**

**File Name:** Supplementary Data 1

**Description:** Raw Data

**File Name:** Supplementary Data 2

**Description:** Code

**File Name:** Supplementary Data 3

**Description:** Data for Supplementary Figure 4

**File Name:** Supplementary Data 4

**Description:** Summary Statistics

**File Name:** Supplementary Data 5

**Description:** Attitudes Towards Conventional and mRNA Vaccines, by Country

**File Name:** Supplementary Data 6

**Description:** Heterogeneity of Novelty Penalty across Demographics
